# Supplementary material for: Label-free plasmonic-based biosensing using a gold nanohole array chip coated with a wafer-scale deposited WS2monolayer
Source: Royal Society of Chemistry journal article supplement (doi:10.1039/d2ra03479d), 2022-01-01
Supplement: d2ra03479d1.pdf [file d2ra03479d1.pdf]

## Supplementary Information

### Label-Free Plasmonic-Based Biosensing Using a Gold Nanohole Array Chip Coated with a Wafer-Scale Deposited WS<sub>2</sub> Monolayer

Lixing Kang<sup>a,b,c,\*†</sup>, Yan Zhang<sup>d,e†</sup>, Qian Gong<sup>c†</sup>, Chandreyee Manas Das<sup>a,b</sup>, Huilin Shao<sup>d,e</sup>, Daniel Puiu Poenar<sup>a,b\*</sup>, Philippe Coquet<sup>a,f</sup>, Ken-Tye Yong<sup>g</sup>

<sup>a</sup>CINTRA CNRS/NTU/THALES, UMI 3288, Research Techno Plaza, 50 Nanyang Drive, Border X Block, Singapore 637553, Singapore

<sup>b</sup>School of Electrical and Electronic Engineering, Nanyang Technological University, 50 Nanyang Avenue, Singapore 639798, Singapore

<sup>c</sup>Division of Advanced Materials, Suzhou Institute of Nano-Tech and Nano-Bionics, Chinese Academy of Sciences, Suzhou 215123, China

<sup>d</sup>Institute for Health Innovation & Technology, National University of Singapore, Singapore 117583, Singapore

<sup>e</sup>Department of Biomedical Engineering, Faculty of Engineering, National University of Singapore, Singapore 117583, Singapore

<sup>f</sup>Institut d'Electronique, de Microélectronique et de Nanotechnologie (IEMN), CNRS UMR 8520 – Université de Lille 1, Villeneuve d'Ascq 59650, France

<sup>g</sup>The University of Sydney Nano Institute, The University of Sydney, Sydney, New South Wales 2006, Australia.

† These authors contributed equally to this work.

\* Corresponding Authors:

E-mail: EPDPuiu@ntu.edu.sg;

E-mail: lxxkang2013@sinano.ac.cn.

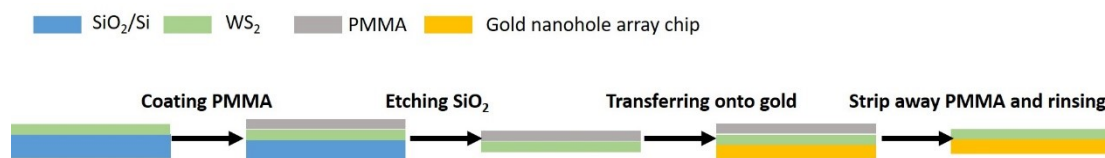

**Fig. S1.** Schematic description of the process used to transfer the WS<sub>2</sub> film onto the gold nanohole array chip.

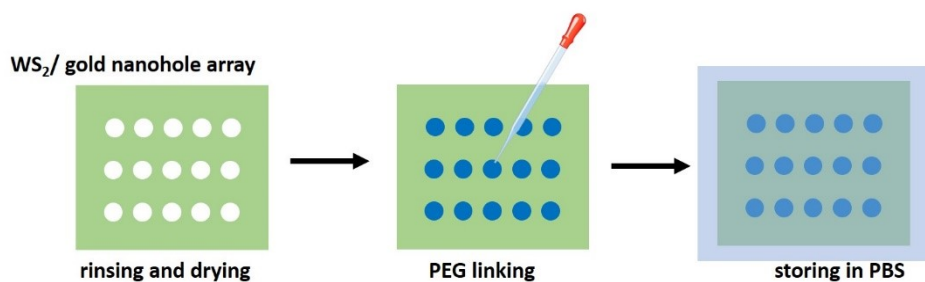

**Fig. S2.** Schematic description of the WS<sub>2</sub> film functionalization process.

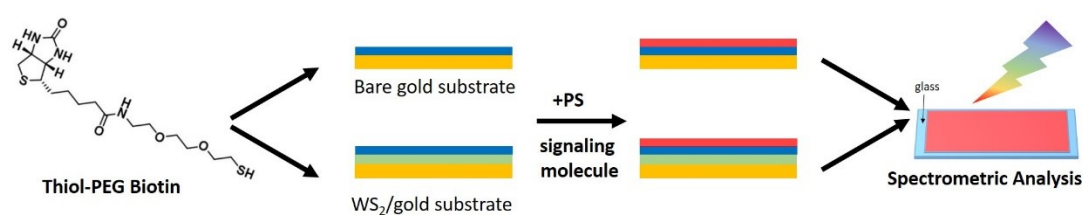

**Fig. S3.** Schematic description of the biotin-streptavidin coupling process.

**Supplementary Table ST1:** Measured thicknesses for 10 different WS<sub>2</sub> monolayer samples and their calculated mean and standard deviation values, respectively.

| Sample nr.                                         | WS <sub>2</sub> film thickness [nm] |
|----------------------------------------------------|-------------------------------------|
| #1                                                 | 0.65                                |
| #2                                                 | 0.82                                |
| #3                                                 | 0.64                                |
| #4                                                 | 0.75                                |
| #5                                                 | 0.63                                |
| #6                                                 | 0.86                                |
| #7                                                 | 0.66                                |
| #8                                                 | 0.72                                |
| #9                                                 | 0.89                                |
| #10                                                | 0.61                                |
| <b>Mean value [nm]</b>                             | <b>0.723</b>                        |
| <b>Standard deviation <math>\sigma</math> [nm]</b> | <b>0.097</b>                        |

**Supplementary Table ST2:** Measured data for the Raman shifts of 10 different WS<sub>2</sub> monolayer samples and their calculated mean and standard deviation values, respectively.

| Sample nr.                                                      | Raman shift [cm <sup>-1</sup> ]<br>for the E <sup>1</sup> <sub>2g</sub> peak | Raman shift [cm <sup>-1</sup> ]<br>for the A <sub>1g</sub> peak |
|-----------------------------------------------------------------|------------------------------------------------------------------------------|-----------------------------------------------------------------|
| #1                                                              | 357.90                                                                       | 422.80                                                          |
| #2                                                              | 355.88                                                                       | 420.78                                                          |
| #3                                                              | 356.91                                                                       | 421.80                                                          |
| #4                                                              | 357.30                                                                       | 422.21                                                          |
| #5                                                              | 354.92                                                                       | 420.02                                                          |
| #6                                                              | 355.89                                                                       | 420.29                                                          |
| #7                                                              | 357.40                                                                       | 422.80                                                          |
| #8                                                              | 354.93                                                                       | 420.62                                                          |
| #9                                                              | 355.89                                                                       | 419.80                                                          |
| #10                                                             | 356.90                                                                       | 421.80                                                          |
| <b>Mean value [cm<sup>-1</sup>]</b>                             | <b>356.384</b>                                                               | <b>421.292</b>                                                  |
| <b>Standard deviation <math>\sigma</math> [cm<sup>-1</sup>]</b> | <b>0.9899</b>                                                                | <b>1.071</b>                                                    |

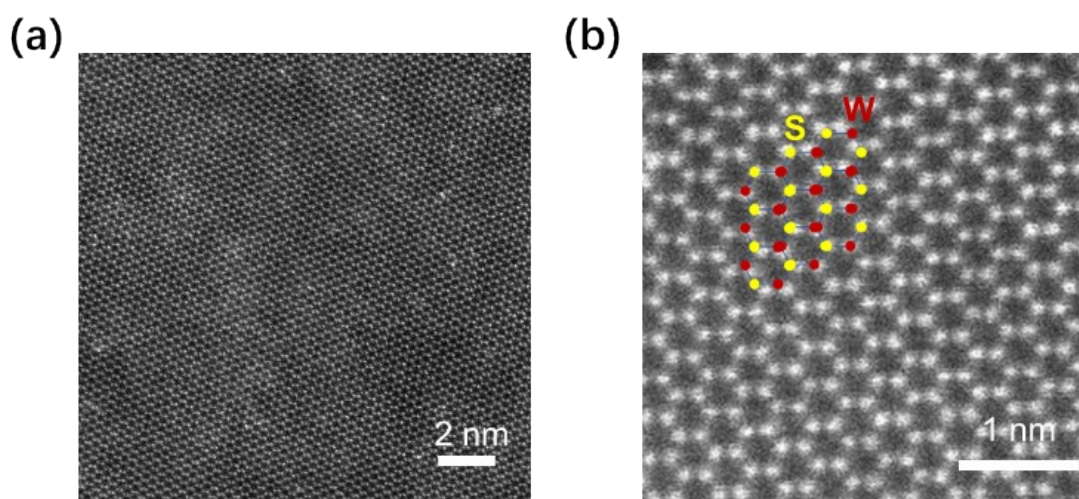

**Fig. S6.** The TEM morphology of the functionalized WS<sub>2</sub> film.

**Supplementary Table ST3:** Mean and standard deviation values of normalized performance parameters: SPR transmission intensity, full width at half maximum (FWHM) of the first transmission peak, and detection sensitivity resulted for 10 different sensors, respectively.

| Parameter of performance | Mean value (normalized) | Standard deviation $\sigma$ |
|--------------------------|-------------------------|-----------------------------|
| Transmissivity           | 1                       | 0.0186                      |
| FWHM                     | 1                       | 0.0133                      |
| Sensitivity              | 1                       | 0.0672                      |

**Supplementary Table ST4:** Values of all parameters for the linear fitting equation  $y = mx + n$  quantifying the extracted variation of the central wavelengths of the main transmission peaks with the RI value of the analyte.

| Fitting parameter values         | <i>Bare Au nanohole array</i> | <i>WS<sub>2</sub>-Au nanohole array</i> |
|----------------------------------|-------------------------------|-----------------------------------------|
|                                  | <i>Second peak</i>            | <i>Second peak</i>                      |
| Slope (sensitivity) $m$ [nm/RIU] | 458.2                         | 563.2                                   |
| Y-axis intercept $n$ [nm]        | 624.2                         | 629.9                                   |
| $R^2$                            | 0.9934                        | 0.9908                                  |

**Supplementary Table ST5:** Comparative analysis between the performances of previously reported plasmonic biosensors of interest.

| Plasmonic Probe                   | Analyte                      | LOD                     | Reference |
|-----------------------------------|------------------------------|-------------------------|-----------|
| Light-diffusing fibers SPR sensor | C-reactive protein           | $1.3 \times 10^{-10}$ M | 1         |
| SPR-sensor chip                   | Human serum transferrin      | $4.4 \times 10^{-9}$ M  | 2         |
| SPR-sensor chip                   | Dopamine                     | $10^{-8}$ M             | 3         |
| SPR-sensor chip                   | Tetramethylthiuram disulfide | $10^{-6}$ M             | 4         |
| SPR-sensor chip                   | Polystyrene                  | $10^6$ beads/mL         | This work |

#### References for Supplementary Table ST5:

1. N. Cennamo, C. Trono, A. Giannetti, F. Baldini, A. Minardo, L. Zeni, Tombelli, *S. Sens. Actuators B Chem.* **2021**, 337, 129771.
2. Y. Mayang, X. He, L. Chen and Y. Zhang, *Microchim. Acta* **2017**, 184, 2749–2757.
3. W. Zhu, X. Feng, Z. Liu, M. Zhao, P. He, S. Yang, S. Tang, D. Chen, Q. Guo, G. Wang, G. Ding, *ACS Appl. Mater. Interfaces* **2021**, 13, 23081–23091.
4. M. Zhang, H. Sun, X. Chen, H. Zhou, L. Xiong, W. Chen, Z. Chen, Z. Bao, Y. Wu, *J. Alloy. Compd.* **2021**, 864, 158189.
